# Supplementary material for: A computational study for rational HIV-1 non-nucleoside reverse transcriptase inhibitor selection and the discovery of novel allosteric pockets for inhibitor design
Source: PubMed Central journal article supplement (PMC5835713; doi:10.1042/bsr20171113), 2018-03-05
Supplement: bsr20171113_Supp1.pdf [file bsr20171113_Supp1.pdf]

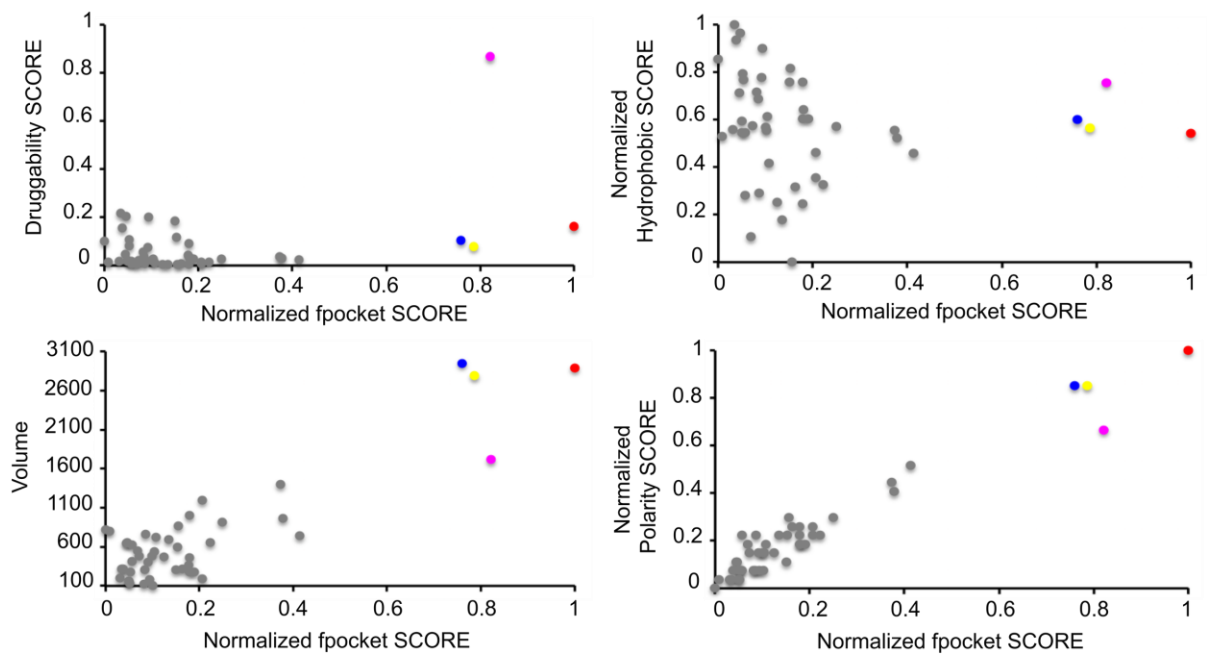

**Figure S1.** Physicochemical properties of the predicted pockets (gray), in particular P1, P2, P3, and the known NNRTI-binding pocket highlighted in red, blue, yellow, and magenta, respectively.

**Table S1.** Structural characterised factors used to construct the structural correlation-based network.

|                                                         | <b>Vpocket (Å<sup>3</sup>)</b> | <b>#AllosComm<br/>(wt / negCtrl)</b> | <b>##ΔΔG/ΔS<br/>(kcal/mol)</b> | <b>RMSD (Å)</b> |
|---------------------------------------------------------|--------------------------------|--------------------------------------|--------------------------------|-----------------|
| <b>Efavirenz (EFZ) - Molecular Weight = ~315 g/mol</b>  |                                |                                      |                                |                 |
| EFZ0 (wt)                                               | 649.4                          | -                                    | -                              | -               |
| EFZ1                                                    | 625.6                          | 0.7<br>(0.76 / 0.14)                 | 6.24 / 0.03                    | 0.85            |
| EFZ2                                                    | 640.4                          | 0.84<br>(0.76 / 0.14)                | 1.94 / 0.03                    | 0.85            |
| <b>Etravirine (ETV) - Molecular Weight = ~435 g/mol</b> |                                |                                      |                                |                 |
| ETV0 (wt)                                               | 930.8                          | -                                    | -                              | -               |
| ETV1                                                    | 1155.3                         | 0.89<br>(0.82 / 0.37)                | 7.33 / 0.06                    | 0.73            |
| ETV2                                                    | 1266.7                         | 0.89<br>(0.81 / 0.37)                | 1.44 / ~0                      | 0.73            |
| ETV3                                                    | 1047.5                         | 0.77<br>(0.77 / 0.37)                | 3.17 / 0.06                    | 0.73            |
| ETV4                                                    | 989.6                          | 0.57<br>(0.74 / 0.37)                | -0.006 / -0.004                | 0.73            |
| <b>Nevirapine (NVP) -Molecular Weight =~266 g/mol</b>   |                                |                                      |                                |                 |
| NVP0 (wt)                                               | 636.9                          | -                                    | -                              | -               |
| NVP1                                                    | 757.6                          | 0.52<br>(0.59 / 0.07)                | 10.27 / 0.1                    | 2.42            |
| NVP2                                                    | 761.0                          | 0.63<br>(0.59 / 0.07)                | -0.64 / 0.02                   | 2.42            |
| NVP3                                                    | 762.3                          | 0.62<br>(0.66 / 0.07)                | 0.64 / 0.001                   | 2.41            |
| <b>Rilpivirine (RPV) - Molecular Weight =~366g/mol</b>  |                                |                                      |                                |                 |
| RPV0 (wt)                                               | 744.0                          | -                                    | -                              | -               |

|      |        |                      |                |      |
|------|--------|----------------------|----------------|------|
| RPV1 | 1062.1 | 0.87<br>(0.7 / 0.1)  | 7.73 / 0.09    | 1.72 |
| RPV2 | 913.4  | 0.76<br>(0.78 / 0.1) | 2.0 / 0.08     | 1.72 |
| RPV3 | 762.7  | 0.69<br>(0.74 / 0.1) | -0.05 / -0.004 | 1.72 |
| RPV4 | 819.2  | 0.81<br>(0.68 / 0.1) | -0.18 / 0.008  | 1.72 |
| RPV5 | 833.5  | 0.91<br>(0.68 / 0.1) | -0.18 / 0.008  | 1.72 |

---

<sup>#</sup>For comparison purposes, estimated allosteric communication values of the control wild type RT (with negative control site) are shown in parentheses

<sup>##</sup> $\Delta\Delta G$  and  $\Delta S$  scores represent free energy and vibrational energy respectively, demonstrating thermo stability of the RT when mutated from the control wild type.

**Table S2.** Clinically identified mutation in Reverse Transcriptase from the 2015 updated HIV-1 report.

|      | V90 | A98 | L100 | K101 | K103 | V106 | V108 | E138 | V179 | Y181 | Y188 | G190 | H2221 | P225 | M230 |
|------|-----|-----|------|------|------|------|------|------|------|------|------|------|-------|------|------|
| EFZ1 |     |     | I    | P    | N    | M    | I    |      |      | C    | L    | S    |       | H    | L    |
| EFZ2 |     |     |      |      | S    |      |      |      |      | I    |      | A    |       |      |      |
| ETV1 | I   | G   | I    | E    |      | I    |      | A    | D    | C    |      | S    |       |      | L    |
| ETV2 |     |     |      | H    |      |      |      | G    | F    | I    |      | A    |       |      |      |
| ETV3 |     |     |      | P    |      |      |      | K    | T    | V    |      |      |       |      |      |
| ETV4 |     |     |      |      |      |      |      | Q    |      |      |      |      |       |      |      |
| NVP1 |     |     | I    | P    | N    | A    | I    |      |      | C    | C    | A    |       |      | L    |
| NVP2 |     |     |      |      | S    | M    |      |      |      | I    | L    |      |       |      |      |
| NVP3 |     |     |      |      |      |      |      |      |      |      | H    |      |       |      |      |
| RPV1 |     |     | I    | E    |      |      |      | A    | L    | C    | L    |      | Y     | C    | I    |
| RPV2 |     |     |      | P    |      |      |      | G    |      | I    |      |      |       |      | L    |
| RPV3 |     |     |      |      |      |      |      | K    |      | V    |      |      |       |      |      |
| RPV4 |     |     |      |      |      |      |      | Q    |      |      |      |      |       |      |      |
| RPV5 |     |     |      |      |      |      |      | R    |      |      |      |      |       |      |      |

**Table S3.** Involved residues in the pockets used for allosteric communication estimation.

|                                                              | Pocket Residue                                                                                                                |
|--------------------------------------------------------------|-------------------------------------------------------------------------------------------------------------------------------|
| Predicted Pocket P1 (p51)                                    | I328, Y338, K348, G352, K353, Y354, E370, A371, Q373, K374, I375, T377, E378, Q407, A408                                      |
| Predicted Pocket P2 (p51)                                    | L92, G93, I94, H96, A98, K101, G152, K154, P157, A158, Y181, Q182, Y183, M184, Y318, Y319, L349, I382, W383, G384, K385, T386 |
| Predicted Pocket P3 (p51)                                    | K259, I393, Q394, K395, F416, N418, T419, P420, P421, K424, L425, Q428                                                        |
| Drug-binding Site (p66)                                      | P95, L100, K103, V108, Y181, Y188, G190, W229, L234, H235, Y318                                                               |
| DNA-binding pocket (including polymerase active site on p66) | D110, D185, D186, D76, Q151, G152                                                                                             |
| Negative control site (p51)                                  | I293, P294, L295, T296                                                                                                        |

**Table S4.** Free allosteric energy change ( $\Delta\Delta G_{\text{site}}$ ) of the DNA polymerase active site when mutating each residue of the pocket P2. The control wild type RT was used in this analysis.

| Pocket P2 Residue | $\Delta\Delta G_{\text{site}}$ | Pocket P2 Residue | $\Delta\Delta G_{\text{site}}$ |
|-------------------|--------------------------------|-------------------|--------------------------------|
| L92               | -0.18                          | Q182              | 0.57                           |
| G93               | 0.48                           | Y183              | 0.74                           |
| I94               | 0.36                           | M184              | 0.63                           |
| H96               | 0.36                           | Y318              | -0.45                          |
| A98               | -0.21                          | Y319              | -0.09                          |
| <b>K101</b>       | <b>-0.93*</b>                  | L349              | -0.23                          |
| G152              | 0.47                           | I382              | 0.18                           |
| K154              | 0.42                           | W383              | 0.18                           |
| P157              | 0.31                           | G384              | 0.14                           |
| A158              | 0.29                           | K385              | 0.21                           |
| Y181              | 0.46                           | T386              | 0.59                           |

\*some mutations, especially at the residue K101, might keep the DNA polymerase site remain rigidified, hence negating them as hot spots in the pocket P2.
